# Supplementary material for: Gallstone Disease and the Risk of Cardiovascular Disease
Source: PubMed Central journal article supplement (PMC6456597; doi:10.1038/s41598-019-42327-2), 2019-04-09
Supplement: 41598_2019_42327_MOESM1_ESM.pdf [file 41598_2019_42327_MOESM1_ESM.pdf]

# Supplementary Information

## Gallstone Disease and the Risk of Cardiovascular Disease

Systematic Review and Meta-analysis of Observational Studies

Cameron J Fairfield<sup>1\*</sup>, Stephen J Wigmore<sup>1</sup>, and Ewen M Harrison<sup>1</sup>

<sup>1</sup>Department of Clinical Surgery, The University of Edinburgh, Edinburgh, EH16 4SA, UK

\*Corresponding Author Email: [cameron.fairfield@ed.ac.uk](mailto:cameron.fairfield@ed.ac.uk)

Supplementary Table S1. Search Strategies

| Database             | Time Span                  | Search Strategy                                                                                                                                                                                                                                                                                                                                                                                                                                                                                                                                                                                                                                                                                                                                                                                                                                                                                                                                                                                                                                                                                                                                                                                                                                                                                                                                                                                                                                                                                                                              |
|----------------------|----------------------------|----------------------------------------------------------------------------------------------------------------------------------------------------------------------------------------------------------------------------------------------------------------------------------------------------------------------------------------------------------------------------------------------------------------------------------------------------------------------------------------------------------------------------------------------------------------------------------------------------------------------------------------------------------------------------------------------------------------------------------------------------------------------------------------------------------------------------------------------------------------------------------------------------------------------------------------------------------------------------------------------------------------------------------------------------------------------------------------------------------------------------------------------------------------------------------------------------------------------------------------------------------------------------------------------------------------------------------------------------------------------------------------------------------------------------------------------------------------------------------------------------------------------------------------------|
| MEDLINE<br>(OVID SP) | 1946 to<br>October<br>2017 | <p>#1 exp Gallstones/<br/> #2 exp Cholecystectomy/<br/> #3 exp Cholecystectomy, Laparoscopic/<br/> #4 (gallstone* or gallbladder-calcul* or<br/> gallbladder-stone* or gall-bladder-stone* or gall-<br/> bladder-calcul or cholelith* or choledocholith* or<br/> cholesterol-stone*).mp. [mp=title, abstract,<br/> original title, name of substance word, subject<br/> heading word, keyword heading word, protocol<br/> supplementary concept word, rare disease<br/> supplementary concept word, unique identifier,<br/> synonyms]<br/> #5 1 or 2 or 3 or 4<br/> #6 exp Myocardial Ischemia/<br/> #7 exp Myocardial Infarction/<br/> #8 exp Coronary Disease/<br/> #9 exp Stroke/<br/> #10 exp Diabetes Mellitus, Type 2/<br/> #11 exp Diabetes Mellitus/<br/> #12 exp Metabolic Syndrome/<br/> #13 exp Insulin Resistance/<br/> #14 exp Peripheral Vascular Diseases/<br/> #15 (myocardial-ischem* or myocardial-ischaem*<br/> or ischaemic-heart* or ischemic-heart* or<br/> myocardial-infarct* or angin* or acute-coronary*<br/> or ACS* or cardiac-infarct* or coronary-heart* or<br/> coronary-disease* or stroke* or cerebrovascular-<br/> disease* or cerebral-ischaem* or cerebral-ischem*<br/> or blood-gluc* or blood-sug* or serum-gluc* or<br/> serum-sug* or metabolic-syndro* or insulin-resist*<br/> or peripheral-vasc* or arterial-ulg* or peripheral-<br/> arter* or PAD* or PVD*).mp. [mp=title, abstract,<br/> original title, name of substance word, subject<br/> heading word, keyword heading word, protocol</p> |

|                                     |                      |                                                                                                                                                                                                                                                                                                                                                                                                                                                                                                                                                                                                                                                                                                                                                                                                                                                                                                                                                                             |
|-------------------------------------|----------------------|-----------------------------------------------------------------------------------------------------------------------------------------------------------------------------------------------------------------------------------------------------------------------------------------------------------------------------------------------------------------------------------------------------------------------------------------------------------------------------------------------------------------------------------------------------------------------------------------------------------------------------------------------------------------------------------------------------------------------------------------------------------------------------------------------------------------------------------------------------------------------------------------------------------------------------------------------------------------------------|
|                                     |                      | <p>supplementary concept word, rare disease supplementary concept word, unique identifier, synonyms]</p> <p>#16 Cohort Studies/<br/> #17 Case-Control Studies /<br/> #18 Cross-Sectional Studies/<br/> #19 Longitudinal Studies/<br/> #20 Retrospective Studies/<br/> #21 Prospective Studies/<br/> #22 Follow-up Studies/<br/> #23 Incidence/<br/> #24 Meta-analysis/<br/> #25 ((retrospective* adj3 (cohort* or stud* or cross* or case* or longitudin* or follow* or review* or meta-analys*)) or (prospective* adj3 (cohort* or stud* or cross* or case* or longitudin* or follow* or review* or meta-analys*)) or cohort* or case-control* or cross-section* or longitudinal* or follow-up-stud* or review* or meta-analys* or incidence*).mp. [mp=title, abstract, original title, name of substance word, subject heading word, keyword heading word, protocol supplementary concept word, rare disease supplementary concept word, unique identifier, synonyms]</p> |
| EMBASE and EMBASE CLASSIC (OVID SP) | 1947 to October 2017 | <p>#1 exp Gallstones/<br/> #2 exp Cholecystectomy/<br/> #3 exp Cholecystectomy, Laparoscopic/<br/> #4 (gallstone* or gallbladder-calcul* or gallbladder-stone* or gall-bladder-stone* or gallbladder-calcul or cholelith* or choledocholith* or cholesterol-stone*).mp. [mp=title, abstract, subject headings, heading word, drug trade name, original title, device manufacturer, drug manufacturer, device trade name, keyword]<br/> #5 1 or 2 or 3 or 4<br/> #6 exp Myocardial Ischemia/<br/> #7 exp Myocardial Infarction/</p>                                                                                                                                                                                                                                                                                                                                                                                                                                          |

|  |                                                                                                                                                                                                                                                                                                                                                                                                                                                                                                                                                                                                                                                                                                                                                                                                                                                                                                                                                                                                                                                                                                                                                                                                                                                                                                                                                                                                                                                                                                                                                                  |
|--|------------------------------------------------------------------------------------------------------------------------------------------------------------------------------------------------------------------------------------------------------------------------------------------------------------------------------------------------------------------------------------------------------------------------------------------------------------------------------------------------------------------------------------------------------------------------------------------------------------------------------------------------------------------------------------------------------------------------------------------------------------------------------------------------------------------------------------------------------------------------------------------------------------------------------------------------------------------------------------------------------------------------------------------------------------------------------------------------------------------------------------------------------------------------------------------------------------------------------------------------------------------------------------------------------------------------------------------------------------------------------------------------------------------------------------------------------------------------------------------------------------------------------------------------------------------|
|  | <p>#8 exp Coronary Disease/<br/> #9 exp Stroke/<br/> #10 exp Diabetes Mellitus, Type 2/<br/> #11 exp Diabetes Mellitus/<br/> #12 exp Metabolic Syndrome/<br/> #13 exp Insulin Resistance/<br/> #14 exp Peripheral Vascular Diseases/<br/> #15 (myocardial-ischem* or myocardial-ischaem* or ischaemic-heart* or ischemic-heart* or myocardial-infarct* or angin* or acute-coronary* or ACS* or cardiac-infarct* or coronary-heart* or coronary-disease* or stroke* or cerebrovascular-disease* or cerebral-ischaem* or cerebral-ischem* or blood-gluc* or blood-sug* or serum-gluc* or serum-sug* or metabolic-syndro* or insulin-resist* or peripheral-vasc* or arterial-ulc* or peripheral-arter* or PAD* or PVD*).mp. [mp=title, abstract, subject headings, heading word, drug trade name, original title, device manufacturer, drug manufacturer, device trade name, keyword]<br/> #16 Cohort Studies/<br/> #17 Case-Control Studies /<br/> #18 Cross-Sectional Studies/<br/> #19 Longitudinal Studies/<br/> #20 Retrospective Studies/<br/> #21 Prospective Studies/<br/> #22 Follow-up Studies/<br/> #23 Incidence/<br/> #24 Meta-analysis/<br/> #25 ((retrospective* adj3 (cohort* or stud* or cross* or case* or longitudin* or follow* or review* or meta-analys*)) or (prospective* adj3 (cohort* or stud* or cross* or case* or longitudin* or follow* or review* or meta-analys*)) or cohort* or case-control* or cross-section* or longitudinal* or follow-up-stud* or review* or meta-analys* or incidence*).mp. [mp=title, abstract, subject</p> |
|--|------------------------------------------------------------------------------------------------------------------------------------------------------------------------------------------------------------------------------------------------------------------------------------------------------------------------------------------------------------------------------------------------------------------------------------------------------------------------------------------------------------------------------------------------------------------------------------------------------------------------------------------------------------------------------------------------------------------------------------------------------------------------------------------------------------------------------------------------------------------------------------------------------------------------------------------------------------------------------------------------------------------------------------------------------------------------------------------------------------------------------------------------------------------------------------------------------------------------------------------------------------------------------------------------------------------------------------------------------------------------------------------------------------------------------------------------------------------------------------------------------------------------------------------------------------------|

|                                                                       |                              |                                                                                                                                                                                                                                                                                                                                                                                                                                                                                                                                                                                                                                                                                                                                                                                                                                                                                                                                                                                                                                                                                 |
|-----------------------------------------------------------------------|------------------------------|---------------------------------------------------------------------------------------------------------------------------------------------------------------------------------------------------------------------------------------------------------------------------------------------------------------------------------------------------------------------------------------------------------------------------------------------------------------------------------------------------------------------------------------------------------------------------------------------------------------------------------------------------------------------------------------------------------------------------------------------------------------------------------------------------------------------------------------------------------------------------------------------------------------------------------------------------------------------------------------------------------------------------------------------------------------------------------|
|                                                                       |                              | headings, heading word, drug trade name, original title, device manufacturer, drug manufacturer, device trade name, keyword]                                                                                                                                                                                                                                                                                                                                                                                                                                                                                                                                                                                                                                                                                                                                                                                                                                                                                                                                                    |
| Science Citation Index EXPANDED and Social Sciences Index             | 1900 to October 2017         | <p>#4 TS=#3 AND #2 AND #1</p> <p>#3 TS=((retrospective* adj3 (cohort* or stud* or cross* or case* or longitudin* or follow* or review* or meta-analys*)) or (prospective* adj3 (cohort* or stud* or cross* or case* or longitudin* or follow* or review* or meta-analys*)) or cohort* or case-control* or cross-section* or longitudinal* or follow-up-stud* or review* or meta-analys* or incidence*)</p> <p>#2 TS=(myocardial-ischem* or myocardial- ischaem* or ischaemic-heart* or ischemic-heart* or myocardial-infarct* or angin* or acute- coronary* or ACS* or cardiac-infarct* or coronary- heart* or coronary-disease* or stroke* or cerebrovascular-disease* or cerebral-ischaem* or cerebral-ischem* or blood-gluc* or blood-sug* or serum-gluc* or serum-sug* or metabolic-syndro* or insulin-resist* or peripheral-vasc* or arterial- ulc* or peripheral-arter* or PAD* or PVD*)</p> <p>#1 TS=(gallstone* or gallbladder-calcul* or gallbladder-stone* or gall-bladder-stone* or gall- bladder-calcul or cholelith* or choledocholith* or cholesterol-stone*)</p> |
| Literatura Latino Americana e do Caribe em Ciências da Saúde (LILACS) | Bireme; 1982 to October 2017 | <p>(gallstone\$ or gallbladder-calcul\$ or gallbladder- stone\$ or gall-bladder-stone\$ or gall-bladder- calcul or cholelith\$ or choledocholith\$ or cholesterol-stone\$) [words] and (myocardial- ischem\$ or myocardial-ischaem\$ or ischaemic- heart\$ or ischemic-heart\$ or myocardial-infarct\$ or angin\$ or acute-coronary\$ or ACS\$ or cardiac- infarct\$ or coronary-heart\$ or coronary-disease\$ or stroke\$ or cerebrovascular-disease\$ or cerebral- ischaem\$ or cerebral-ischem\$ or blood-gluc\$ or blood-sug\$ or serum-gluc\$ or serum-sug\$ or</p>                                                                                                                                                                                                                                                                                                                                                                                                                                                                                                        |

|  |  |                                                                                                                                                                                                                                                                                                          |
|--|--|----------------------------------------------------------------------------------------------------------------------------------------------------------------------------------------------------------------------------------------------------------------------------------------------------------|
|  |  | metabolic-syndro\$ or insulin-resist\$ or peripheral-vasc\$ or arterial-ulg\$ or peripheral-arter\$ or PAD\$ or PVD\$) [words] and (retrospective\$ or prospective\$ or cohort\$ or case-control\$ or cross-section\$ or longitudinal\$ or follow-up-stud\$ or review\$ or meta-analys\$ or incidence\$) |
|--|--|----------------------------------------------------------------------------------------------------------------------------------------------------------------------------------------------------------------------------------------------------------------------------------------------------------|
